# Supplementary material for: Transcriptome sequencing and de novo annotation of the critically endangered Adriatic sturgeon
Source: PubMed Central journal article supplement (PMC3691660; doi:10.1186/1471-2164-14-407), 2013-06-18

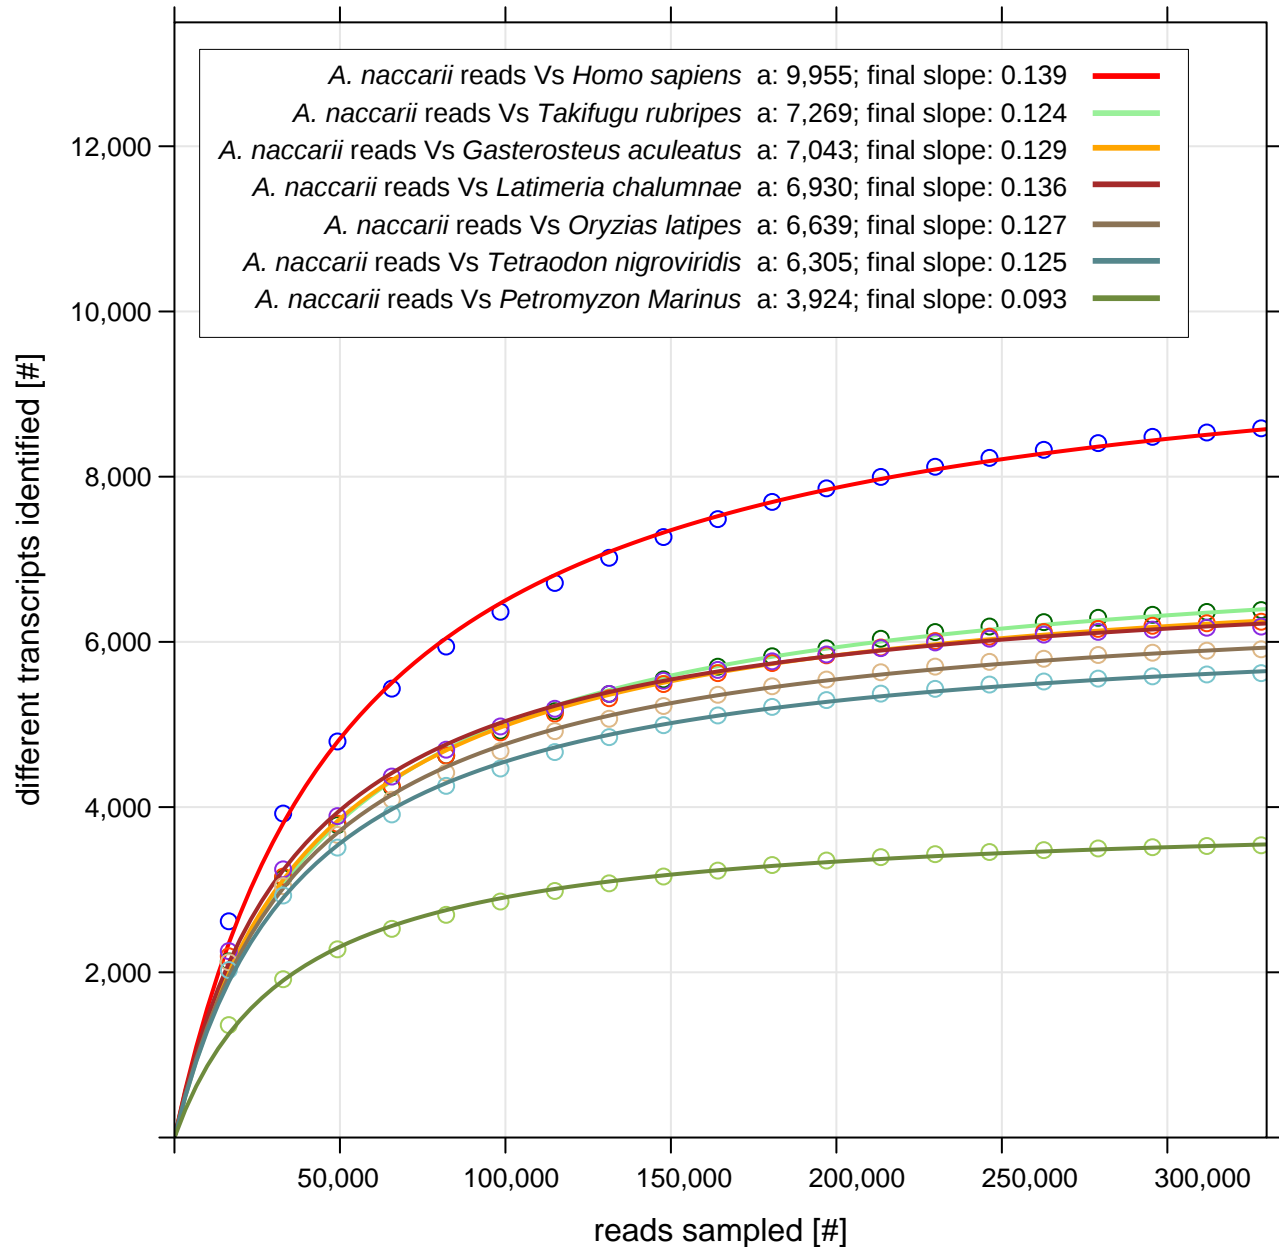

Supplement: 1471-2164-14-407-S9.pdf [file 1471-2164-14-407-S9.pdf]
